# Supplementary material for: Synthesis of hollow PtAg alloy nanospheres with excellent electrocatalytic performances towards methanol and formic acid oxidations
Source: Royal Society of Chemistry journal article supplement (doi:10.1039/c6ra06398e), 2016-01-01
Supplement: c6ra06398e1.pdf [file c6ra06398e1.pdf]

## Supplementary Information

### Synthesis of hollow PtAg alloy nanospheres with excellent electrocatalytic performances towards methanol and formic acid oxidations

Fulin Zheng,<sup>a</sup> Sin-Yee Luk,<sup>a</sup> Tsz-Lung Kwong<sup>a</sup> and Ka-Fu Yung<sup>\*a</sup>

Department of Applied Biology and Chemical Technology, The Hong Kong Polytechnic University, Hung Hom, Kowloon, Hong Kong.

E-mail: bckfyung@polyu.edu.hk; Tel.: +852 3400 8863, Fax: +852 2364 9932

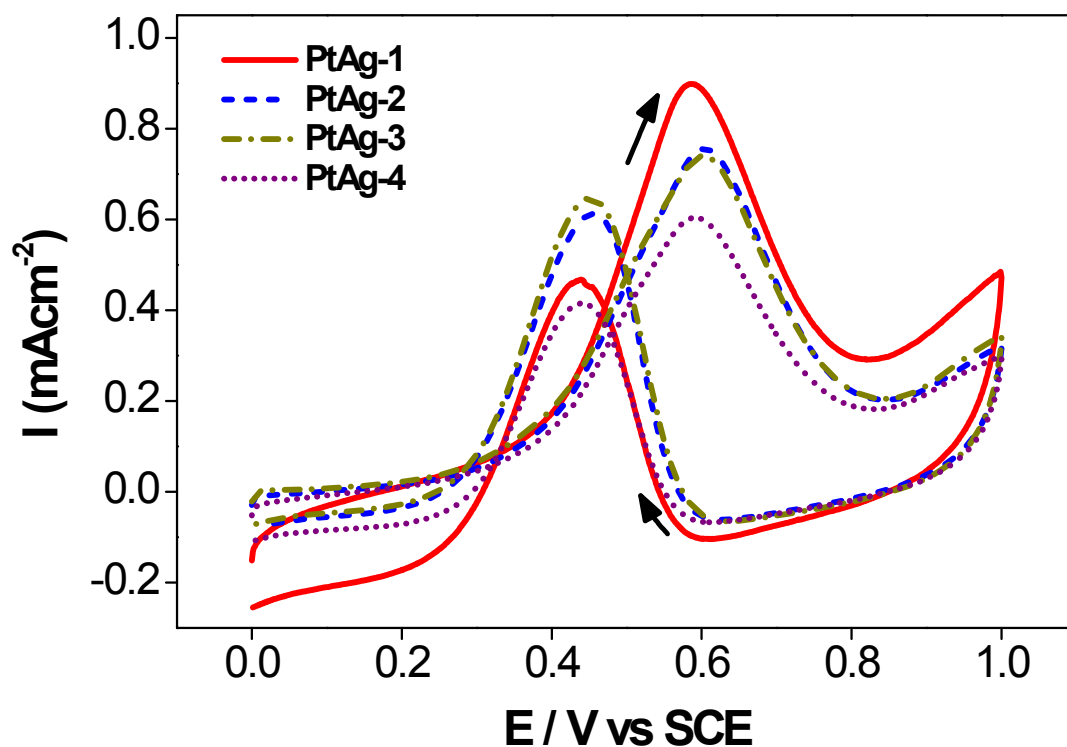

Fig. S1 CVs of PtAg alloys in 0.1M methanol + 0.1M H<sub>2</sub>SO<sub>4</sub> with a scan rate of 50mVs<sup>-1</sup>.

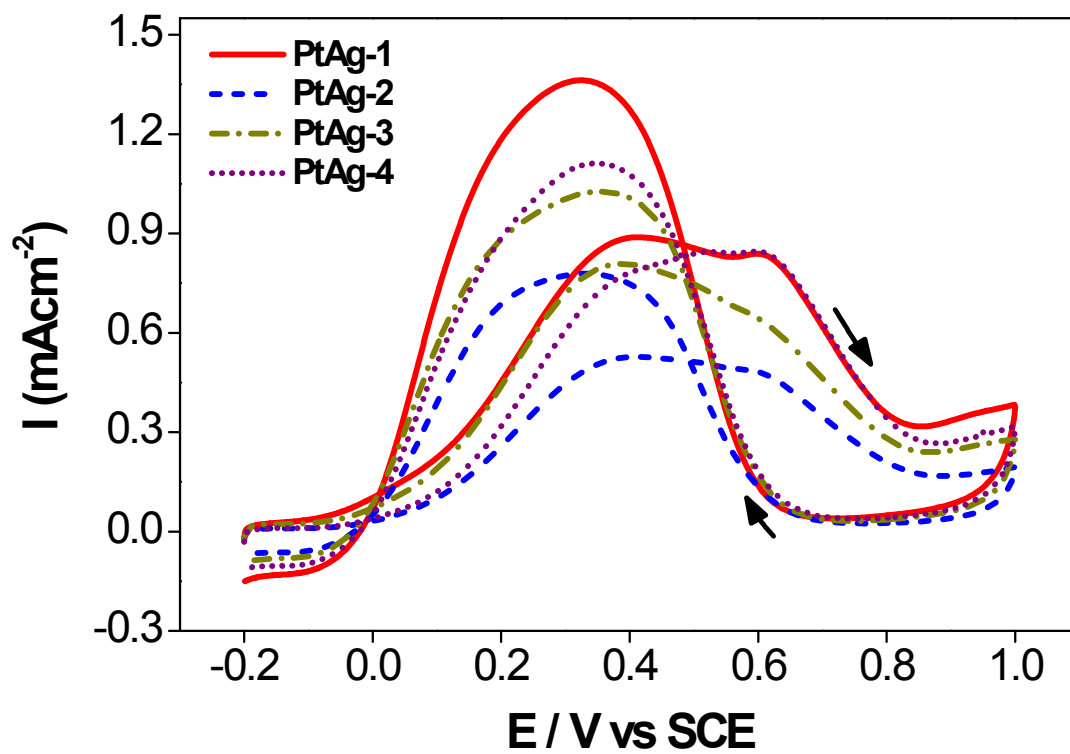

**Fig. S2** CVs of PtAg alloys in 0.05M HCOOH + 0.1M H<sub>2</sub>SO<sub>4</sub> solutions with a scan rate of 50mVs<sup>-1</sup>.
